# Supplementary material for: SGI-4 in Monophasic Salmonella Typhimurium ST34 Is a Novel ICE That Enhances Resistance to Copper
Source: Front Microbiol. 2019 May 24;10:1118. doi: 10.3389/fmicb.2019.01118 (PMC6543542; doi:10.3389/fmicb.2019.01118)
Supplement: Table S1 — Oligonucleotide primers used for the construction of mutant strains of Salmonella, determination of genotype, or qRT-PCR. [file Table_1.XLSX]

## Sheet: Feuil1
Supplementary Table 1. Primers used in the study
Nucleotide sequence (5' --> 3')
Primers for allelic exchange by recombineering
Primers to test genotype	Description	Parent strain	Mutant strain genotype
TGCTGTCGCGAATTCCGGTAGTTTGTAAAACACCATTACTGGAGCAATTCGgtgtaggctggagctgcttcg	Forward primer for insertion of cat within bar of SGI-4 arsenic locus	S04698-09	S04698-09Δbar::cat
AAGCGATTGAAATAAACATAAAGGGGGCAGACGCCCCCTTATTCCTGCCcatatgaatatcctccttagt	Reverse primer for insertion of cat within bar of SGI-4 arsenic locus	S04698-09	S04698-09Δbar::cat
CGATTACTAAGGTCAATGAATTGATGACCAATCATAAAGGAGTTTTTACTgtgtaggctggagctgcttcg	Forward primer for deletion of copA thorugh insertion of aph	SL1344	SL1344ΔcopA::aph
TGATGGCTTAATAATATATCAGGCAGCTGATGCTGCCTGATATAGCGTTTcatatgaatatcctccttagt	Reverse primer for deletion of copA thorugh insertion of aph	SL1344	SL1344ΔcopA::aph
TCTGGACTTCATTTGAACCATTTACCAGGTCTGCCTGGACGAGAAGCGTTgtgtaggctggagctgcttcg	Forward primer for deletion of silSRCBA with insertion of cat	S04698-09	S04698-09ΔsilRSCBA::cat
TCAGGGTGAATCAGTAAAGAAGGACACCCACAGGGGGTGCCCTTTCAGGTcatatgaatatcctccttagt	Reverse primer for deletion of silSRCBA with insertion of cat	S04698-09	S04698-09ΔsilRSCBA::cat
ATCGGTTCTCGAATTCTGTCAGTAACCATACTTTATATAAGGGAACGCGCgtgtaggctggagctgcttcg	Forward primer for deletion of pcoGABDRSE with insertion of cat	S04698-09	S04698-09ΔpcoGEABDRSE::cat
AACTCGCTGATATGAATGTAAAAATCTCACGCATGAGCTTTGGCTGTCCCcatatgaatatcctccttagt	Reverse primer for deletion of pcoGABDRSE with insertion of cat	S04698-09	S04698-09ΔpcoGEABDRSE::cat
GCATTTAAAGACTCTTAAAATAGTAAGGGAGTTGGTTCCGGTGGAGGAAAgtgtaggctggagctgcttcg	Forward primer for deletion of sciY with insertion of cat	S04698-09	S04698-09ΔsciY::cat
AATAAAATCCGGGAAGACAAAAGATCTTTCCCGGCTTTTTATTTTCATTTcatatgaatatcctccttagt	Reverse primer for deletion of sciY with insertion of cat	S04698-09	S04698-09ΔsciY::cat
Primers for qPCR and generation of standard curves
Primers to test genotype	Description
CTATCGACCTGACCCTGGAC	Forward primer for PCR for standard curve of copA in S04698-09
AAAACGTTTCATGGTGGCGA	Reverse primer for PCR for standard curve of copA in S04698-09
GCGGACGCGTTAATTGAAAC	Forward primer for qPCR of copA in S04698-09
TGTTGGCTTTCTTCATCGGC	Reverse primer for qPCR of copA in S04698-09
CATTGACCCTGAACTGGCAC	Forward primer for PCR for standard curve of rpoD in S04698-09
CCATCTCTTTCTTCGCACGG	Reverse primer for PCR for standard curve of rpoD in S04698-09
GTCAACAGTATGCGCGTGAT	Forward primer for qPCR of rpoD in S04698-09
GATAGCGGCATTGAACCAGG	Reverse primer for qPCR of ropD in S04698-09
TTATCAACGGCTCGGCAATG	Forward primer for PCR for standard curve of pcoA in S04698-09
GCCTGCATATCAACCAGTGG	Reverse primer for PCR for standard curve of pcoA in S04698-09
GAATGGACCACAGCCAGATG	Forward primer for qPCR of pcoA in S04698-09
GACGCAGGATGACTTTGCAT	Reverse primer for qPCR of pcoA in S04698-09
Primers to test genotype	Description
AGGCTGCGCAGGGTATTAT	Forward primer (SGI-4 outward facing) for testing Phe-tRNA insertion site
GTCCCTCAAGTAAGGGAAC	Reverse primer (in SGI-4 flanking sequence) for testing Phe-tRNA insertion site
AGGCTGCGCAGGGTATTAT	Forward primer for testing SGI-4 presence
AATGATCGGATCTTCTGATGGA	Reverse primer for testing SGI-4 presence
AGGAGAAACAACAATCGGCG	Forward primer for PCR of SGI-4 facing outwards to test for SGI-4 circularisation
AACGTCGGGAAGTATGGGTT	Reverse primer for PCR of SGI-4 facing outwards to test for SGI-4 circularisation
